# Supplementary material
Source: publisher figshare collection journal article supplement (https://springernature.figshare.com/ndownloader/files/38571293)
Supplement: Supplementary file 1 [file 38571293]

## README file of ARCLIM dataset

This readme file contains information about the files in ARCLIM dataset (Rantanen et al., 2022). If you have any questions or request, please feel free to contact Mika Rantanen [mika.rantanen@fmi.fi](mailto:mika.rantanen@fmi.fi)

### Domain

The domain of the variables covers 45-90°N, -180-180°E.

### Coordinate reference system

The NETCDF files are in a regular lat/lon grid with 0.1° resolution. The TIF files use EPSG:4326 coordinate reference system.

### Annual layers

The annual values of each ARCLIM variable are found from files that follow the naming format “arclim\_variable.nc”, where “variable” refers to the abbreviation shown below and Table 2 of the manuscript (e.g. arclim\_GSL.nc).

### Mean layers

The averages for 1991-2020 are found from arclim\_means.nc and arclim\_means.tif. The order of the variables follows the order below and Table 2 of the manuscript.

### Trend layers

The temporal trends for 1951-2021 are found from arclim\_trends.nc and arclim\_trends.tif, and the p-values indicating the statistical significance from arclim\_pvalues.nc and arclim\_pvalues.tif. The order of the variables in the datafiles follows the order below and Table 2 of the manuscript.

| Order | Full name                              | Short name | Unit               |
|-------|----------------------------------------|------------|--------------------|
| 1.    | Thermal growing season length          | GSL        | days               |
| 2.    | Thermal growing degree day sum         | GDD        | °C days            |
| 3.    | Frost during the growing season        | FGS        | °C days            |
| 4.    | Freezing degree days                   | FDD        | °C days            |
| 5.    | Number of rain-on-snow events          | ROS        | year <sup>-1</sup> |
| 6.    | Number of winter warming events        | WWE        | year <sup>-1</sup> |
| 7.    | Intensity of winter warming events     | WWI        | °C days            |
| 8.    | Heatwave magnitude index               | HWMI       |                    |
| 9.    | Vapor pressure deficit magnitude index | VPDI       |                    |

|     |                                  |      |                    |
|-----|----------------------------------|------|--------------------|
| 10. | Summer warmth index              | SWI  | °C                 |
| 11. | Snow season length               | SSL  | days               |
| 12. | Onset of snow season             | SSO  | day of year        |
| 13. | End of snow season               | SSE  | day of year        |
| 14. | Number of high wind speed events | HWE  | year <sup>-1</sup> |
| 15. | Annual mean temperature          | TAVG | K                  |
| 16. | Annual precipitation             | PRA  | mm                 |
| 17. | Annual snowfall                  | SFA  | mm                 |
| 18. | Annual 10-m wind speed           | WSA  | m s <sup>-1</sup>  |
